# Supplementary material for: Interfacial nano-mixing in a miniaturised platform enables signal enhancement and in situ detection of cancer biomarkers
Source: Royal Society of Chemistry journal article supplement (doi:10.1039/c7nr09496e), 2018-01-01
Supplement: c7nr09496e1.pdf [file c7nr09496e1.pdf]

## Electronic Supplementary Information

### **Interfacial nano-mixing in a miniaturized platform enables signal enhancement and in-situ detection of cancer biomarkers**

Alain Wuethrich,<sup>a</sup> Abu Ali Ibn Sina<sup>a</sup>, Mostak Ahmed<sup>a</sup>, Ting-Yun Lin<sup>a</sup>, Laura

G. Carrascosa,<sup>a</sup> Matt Trau<sup>a,b\*</sup>

<sup>a</sup>Centre for Personalized Nanomedicine, Australian Institute for Bioengineering and Nanotechnology (AIBN), Corner College and Cooper Roads (Bldg 75), The University of Queensland, Brisbane QLD 4072, Australia

<sup>b</sup>School of Chemistry and Molecular Biosciences, The University of Queensland, Brisbane, QLD 4072, Australia

\*Corresponding author

<sup>§</sup>Equal Contribution

Tel: +61-7-33464178; Fax: +61-7-33463973

#### **Table of contents**

|               |                                                                                                  |
|---------------|--------------------------------------------------------------------------------------------------|
| <b>Page 1</b> | Figure S1. Schematic representation of the fabrication of nanomixing-enhanced biosensing device. |
| <b>Page 3</b> | Figure S2. Damage of the biosensor due to voltage application.                                   |
| <b>Page 4</b> | Figure S3. Effect of repeated nanomixing on the electrochemical read-out.                        |
| <b>Page 5</b> | Figure S4. Dynamic range of nanomixing-enhanced sensor.                                          |
| <b>Page 6</b> | Figure S5. Saturation of the enhanced biosensor.                                                 |
| <b>Page 7</b> | ESI Table S1.                                                                                    |

Figure S1.

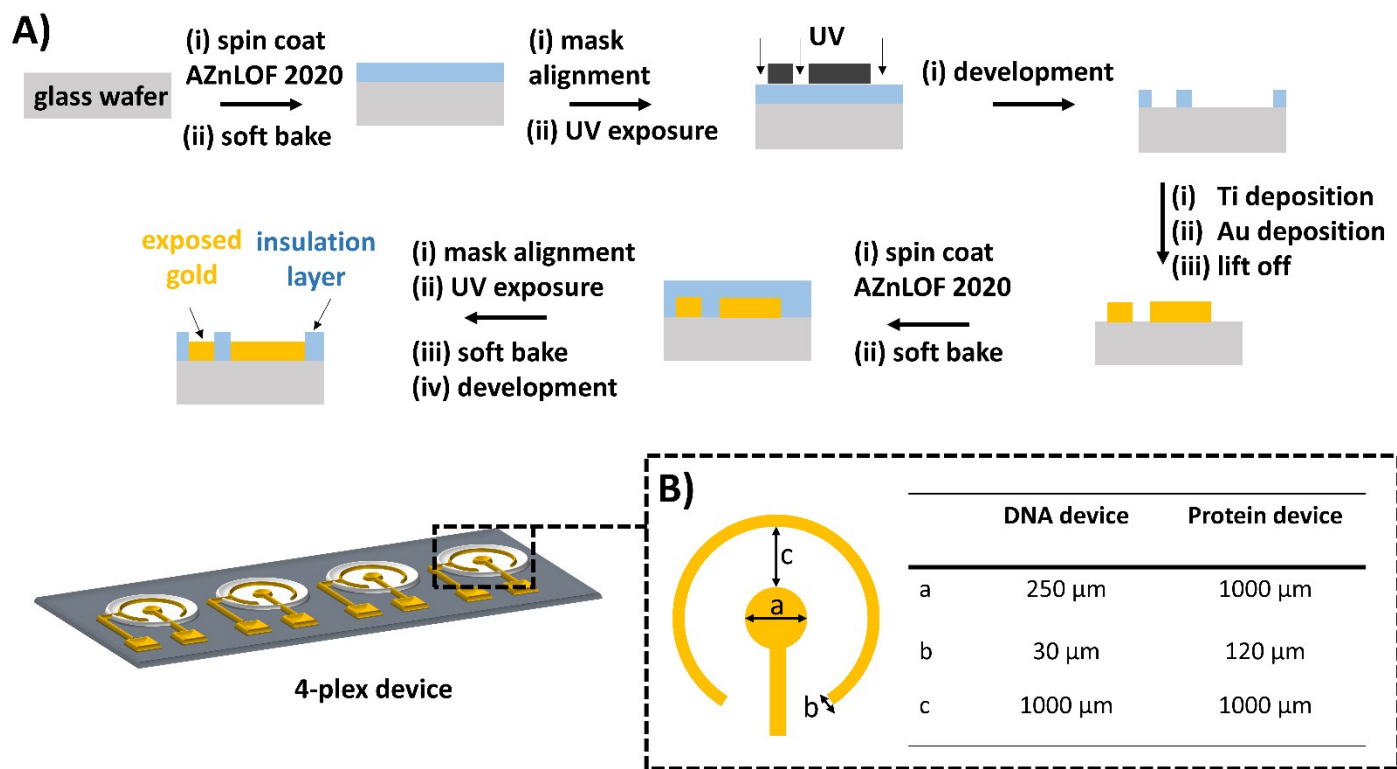

**Figure S1.** (A) Schematic representation of the fabrication of nanomixing-enhanced 4-plex device. (B) Shows the dimensions of the asymmetric electrodes used for the DNA and protein device.

**Figure S2**

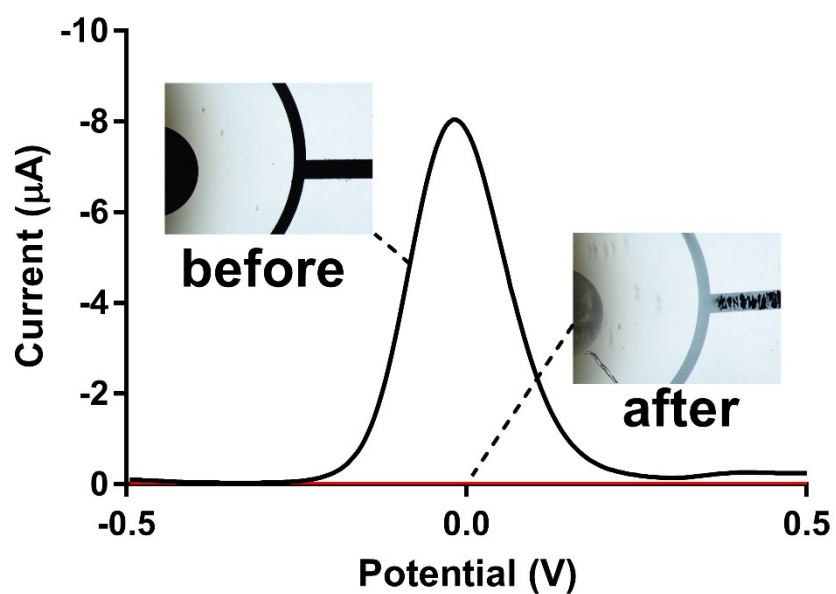

**Figure S2.** Damage of the biosensor due to voltage application. The voltammograms before (baseline, black) and after nanomixing for 10 min at 10 V (red). The inset show the brightfield microscope images of the same sensor before and after nanomixing.

**Figure S3**

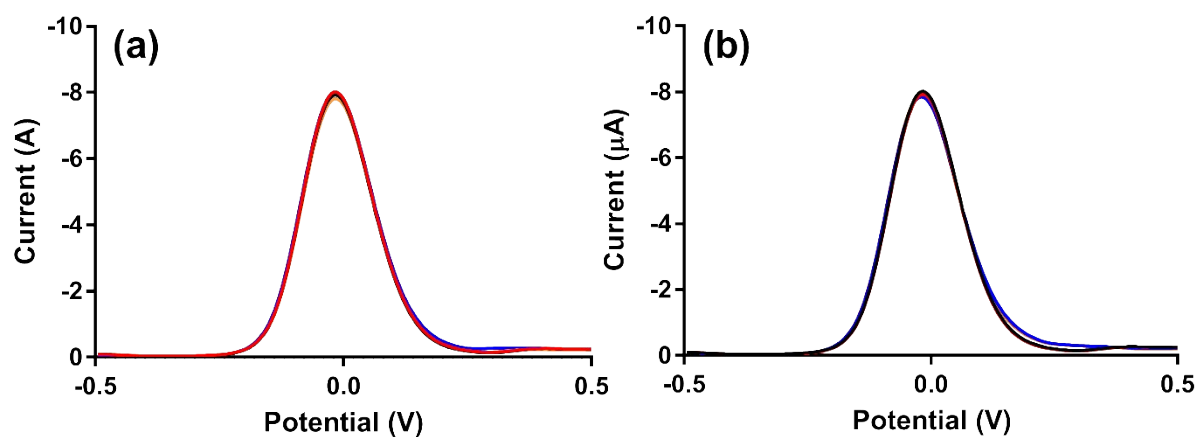

**Figure S3** shows the effect of repeated nanomixing on the electrochemical read-out using (a) the protein buffer and (b) DNA buffer. Overlaid voltammograms of three repeated nanomixing cycles on the same electrode. Nanomixing was performed in (a) and (b) for 3min/1.5 V/500 Hz and 3min/0.8 V/500 Hz.

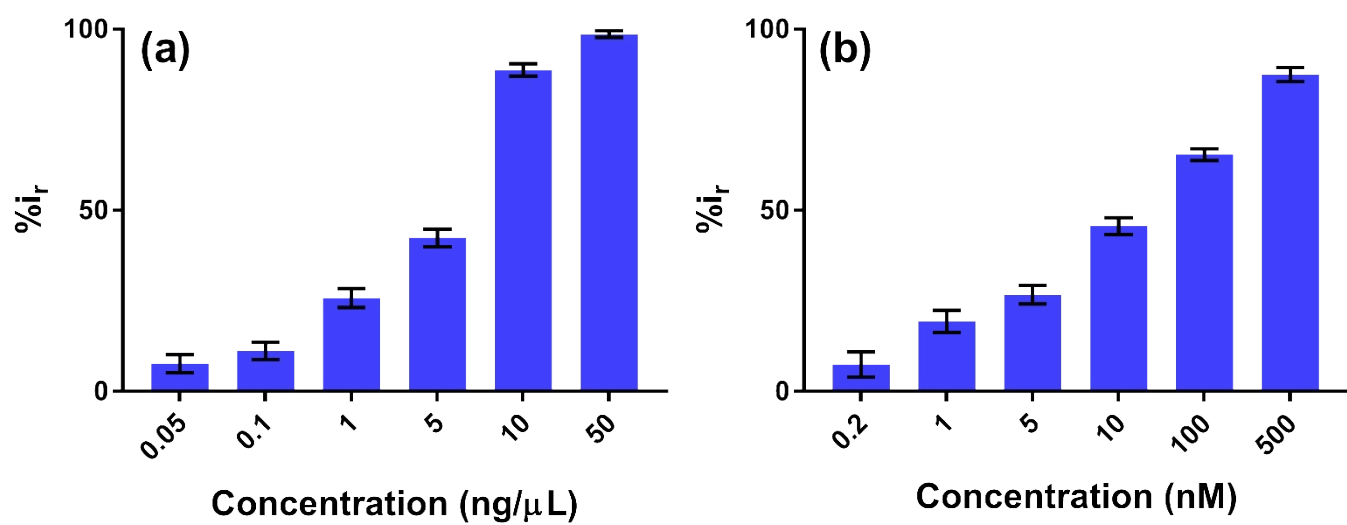

**Figure S4**

**Figure S4.** Dynamic range of nanomixing-enhanced sensor for the detection of (a) BSA and (b) synthetic DNA.

**Figure S5.**

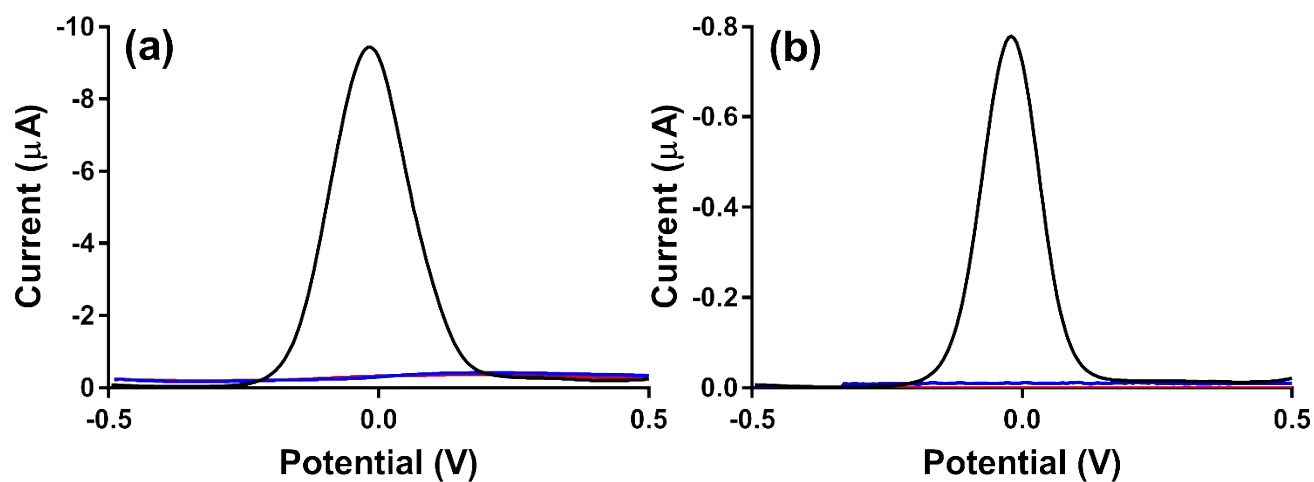

**Figure S5.** Saturation of the enhanced biosensor. In (a), the concentration of EGFR (red) and phosphorylated EGFR (blue) was 10 ng/ $\mu\text{L}$ . In (b), the concentration of DNA (red) and methylated DNA (blue) was 5 ng/ $\mu\text{L}$ . The baseline is shown in black.

**Table S1**

| <b>Description</b>                                 | <b>Sequence</b>                                                  |
|----------------------------------------------------|------------------------------------------------------------------|
| Region of interest from EN1 gene                   | 5'-TTGGTGCCCTGCGCTCCGGGGCTCCCCGCG<br>CCGCCTCCACTGCCGCCGCCACCG-3' |
| Forward primer for asymmetric PCR of<br>EN1 region | 5'-ATTCAGTCCACAACAAYGTTGGTTGAG<br>TTTATAAGTAGGATAGT-3'           |
| Reverse primer for asymmetric PCR of<br>EN1 region | 5'-ACRACCRCAACAACCAAACCCT-3                                      |
| Synthetic DNA                                      | 5'-GATAACGACGACAATAAAAACGACGCGAA<br>AAACCCCGAAACGCAAAACACCAA-3'  |
